# Supplementary material for: The actinin family of actin cross-linking proteins – a genetic perspective
Source: PubMed Central journal article supplement (PMC4550062; doi:10.1186/s13578-015-0029-7), 2015-08-25

## Additional file 1

### Multiple sequence alignment of selected actinin protein sequences

An alignment prepared using ClustalX of human actinin-1, -2, -3 and -4, as well as actinin sequences from select model organisms. Sequence conservation is plotted beneath the alignment and conserved residues marked and color-coded according to the default ClustalX settings. Locations of PFAM protein domains as identified in the Protein Data Bank for human actinin-2 (PDB ID: 4D1E) are indicated in red below the alignment. Known disease/phenotype associated mutations for the human actinins are identified in red text above the alignment. Accession numbers for sequences are as follows: *HsACTN1* = NP\_001093.1; *HsACTN2* = NP\_001094.1; *HsACTN3* = NP\_001095.2; *HsACTN4* = NP\_004915.2; *DdACTN* = XP\_646979; *DmACTN* = NP\_477484; *CeACTN* = NP\_506127; *SpACTN* = NP\_594295. Hs = *Homo sapiens*; Dm = *Drosophila melanogaster*; Ce = *Caenorhabditis elegans*; Dd = *Dictyostelium discoideum*; Sp = *Schizosaccharomyces pombe*

ACTN2 Q9R ↘ ACTN1 D22N ↘ ACTN1 Q32K ↘ ACTN4 W59R ↘ ACTN1 R46Q/W ↘

HsACTN1 -MDHYDSQQ-----TNDYMQPEEDWDRDLLLDPAAWEKQQRKFTTAWCNSHLR-KAGTQIENIEEDFR 60  
HsACTN4 MVDYHAANQSYOYGPSSAGNGAGGGGSMGDYMAQEDDWRDLLLDPAAWEKQQRKFTTAWCNSHLR-KAGTQIENIDEDFR 79  
HsACTN2 -MNQIEPG-----VQYNYVYDEDEYMQEEEDWRDLLLDPAAWEKQQRKFTTAWCNSHLR-KAGTQIENIEEDFR 67  
HsACTN3 MMMVMQPEG-----LGAGEGRFAGGGGGGEYMQEEDWDRDLLLDPAAWEKQQRKFTTAWCNSHLR-KAGTQIENIEEDFR 74  
DmACTN MMMENGLSMEY-----GDGYMEQEEEWEREGLLDPAAWEKQQRKFTTAWCNSHLR-KAGTADNIEEDFR 63  
CeACTN MVDYYQOPP-----SYHQPGYDYTOEEEDWREGLLDPAAWEKQQRKFTTAWCNSHLR-KAGTSIDTIEEDFR 66  
DdACTN -----MSEETPVSGNDKQ--LLNKAWETQKFTTAWCNSHLR-KLGSSTIEQIDTDF 51  
SpACTN -----MQANQWQSVGNRTFTKWFNTKLSRRDLPSVFDLRKDL 38

1.....10.....20.....30.....40.....50.....60.....70.....80

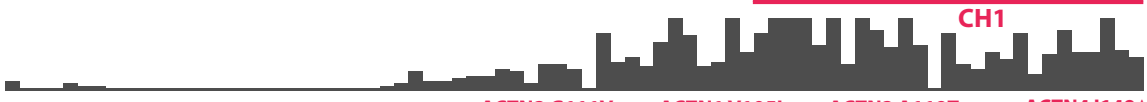

ACTN2 G111V ↘ ACTN1 V105I ↘ ACTN2 A119T ↘ ACTN4 I149A ↘

HsACTN1 DGLKMLLLEVISGERLAKPERG-KMRVHKISNVNKALDFIASKGVKLVSIGAEEIVDGNVKMTLGMIIWIIILRFAIQDI 139  
HsACTN4 DGLKMLLLEVISGERLPKPERG-KMRVHKINNVNKALDFIASKGVKLVSIGAEEIVDGNAKMTLGMIIWIIILRFAIQDI 158  
HsACTN2 NGLKMLLLEVISGERLPKDRG-KMRFHKIANVNKALDYIASKGVKLVSIGAEEIVDGNVKMTLGMIIWIIILRFAIQDI 146  
HsACTN3 NGLKMLLLEVISGERLPRDKG-KMRFHKIANVNKALDFIASKGVKLVSIGAEEIVDGNLKMIIWIIILRFAIQDI 153  
DmACTN NGLKMLLLEVISGETLPKDRG-KMRFHKIANVNKALDFIASKGVHLSVIGAEEIVDGNLKMIIWIIILRFAIQDI 142  
CeACTN NGLKMLLLEVISGEPLPKDRG-KMRFHKIANVNKALEVIESKGVKLVSIGAEEIVDGNVKMTLGLIWIILRFAIQDI 145  
DdACTN DGIKLAQLLEISNDPVPKVNKTPKLRHNIQNVLCKLIESHGKLVIGAEELVDKMLKMTLGMIIWIIILRFAIQDI 131  
SpACTN DGILLIQLEIIGDENLGRYNRNPRMRVHRLNENKALEVIKSKGMPLTNI GPADIVDGNLKLILGLIWIILRFIADI 118

.....90.....100.....110.....120.....130.....140.....150.....160

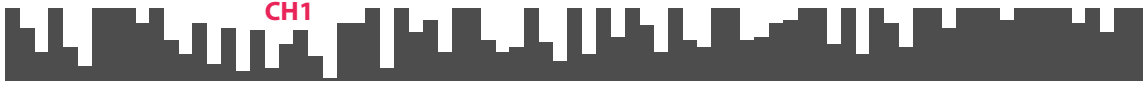

HsACTN1 SVEETSAAKEGILLWCORRTAPYK-NVNIQNFHISWKDGLGFCALIHRRRPELIDYGKLRKDDPLTNLNTAFDVAEKYLDI 218  
HsACTN4 SVEETSAAKEGILLWCORRTAPYK-NVNVQNFHISWKDGLAFNALIHRRRPELIEYDKLRKDDPVTNLNNAFVEAEKYLDI 237  
HsACTN2 SVEETSAAKEGILLWCORRTAPYR-NVNIQNFHTSWKDGGLCALIHRRRDLIDYSKLNKDDPIGNINLAMEIAEKHLDI 225  
HsACTN3 SVEETSAAKEGILLWCORRTAPYR-NVNVQNFHTSWKDGGLCALIHRRRDLIDYAKLRKDDPIGNLNTAFVEAEKYLDI 232  
DmACTN SVEEMTAKEGILLWCORRTAPYK-NVNVQNFHLSFKDGLAFCALIHRRRDLIDYAKLSKDNPLENLNTAFDVAEKYLDI 221  
CeACTN NVEELSARDGILLWCORRTAPYN-NVNVQNFHNSWKDGLAFCALIHRRRDLIDYSOLHKGDP IHNLNLAFDIAEKHLDI 224  
DdACTN SIEELTAKEGILLWCORRTAPYD-RVKVGNFHTSFQDGLAFCALIHRRRDLINFDLSLNKDDKAGNLQAFDIAEKELDI 210  
SpACTN NEEGLTAKEGILLWCORRTANYHPEVDVQDFTRSWTNGLAFCALIHRRRDLIDYKLDKKNHRANMQLAFDIAQKSGIGI 198

.....170.....180.....190.....200.....210.....220.....230.....240

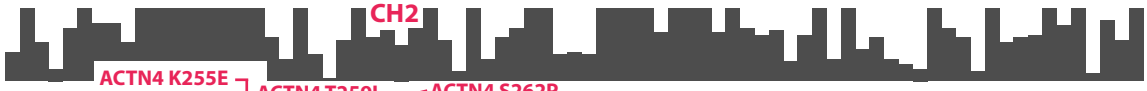

ACTN2 M228T ↘ ACTN4 K255E ↘ ACTN4 T259I ↘ ACTN4 S262P ↘ ACTN1 E225K ↘ ACTN1 G251R ↘

HsACTN1 PKMLDAEDIVGTARPDEKAIMTYVSSFYHAFSGAOK-----AETAANRICKVLAVNQE 271  
HsACTN4 PKMLDAEDIVNTARPDEKAIMTYVSSFYHAFSGAOK-----AETAANRICKVLAVNQE 290  
HsACTN2 PKMLDAEDIVNTPKPDERAIMTYVSCFYHAFAGAEQ-----AETAANRICKVLAVNQE 278  
HsACTN3 PKMLDAEDIVNTPKPDEKAIMTYVSCFYHAFAGAEQ-----AETAANRICKVLAVNQE 285  
DmACTN PRMLDPPDLQNTALPDERAVMTYVSSFYHAFSGAOK-----AETAANRICKVLAVNQE 274  
CeACTN PKMLDAEDVSS--RHPDEKAIMTYVSCFYHAFNRMRDPPPPVIRPPPPORVVVAPPPERDWRKDAETAANRICKVLAVNQE 302  
DdACTN PKMLDVSMDLQNTALPDERAVMTYVVAQYHAFSGAOK-----AETAANRICKVLAVNQE 263  
SpACTN PRLIEVEDVCDVDRPDERAIMTYVAEYHAFSTLTK-----VETAARRVERFTEVLMS 251

.....250.....260.....270.....280.....290.....300.....310.....320

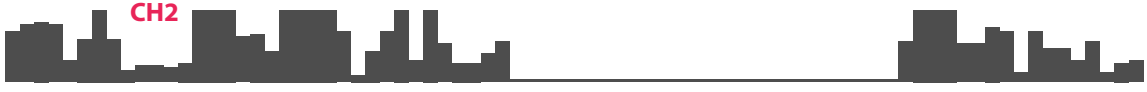

HsACTN1 NEQLMEDYEKLASDLEWIRRTIPWLENRVPEENTMHAMQOKLEDFRDYRRLHKPPKVOEKCOLEINFNTLOTKLRLSNRP 351  
HsACTN4 NEHLMEDYEKLASDLEWIRRTIPWLEDVPOKTIQEMQOKLEDFRDYRVRVHKPPKVOEKCOLEINFNTLOTKLRLSNRP 370  
HsACTN2 NERLMEEYERLASELLEWIRRTIPWLENRTPEKTMQAMOKLEDFRDYRRLHKPPKVOEKCOLEINFNTLOTKLRLSNRP 358  
HsACTN3 NEKLMEEYERLASELLEWIRRTIPWLENRVGEPMSAMOKLEDFRDYRRLHKPPRIQEKCOLEINFNTLOTKLRLSNRP 365  
DmACTN NERLMEEYERLASELLEWIRRTIPWLNRSQADNSLAGVOKKLEEYRTYRRLHKPPRVEQAKLETNFNTLOTKLRLSNRP 354  
CeACTN NEKMEDYENLASDLLAWINRWMPWANRSTDDTLQQAOKLEDFRNYRREKPPRIEDKGRLETNFNTLOTKLRLSNRP 382  
DdACTN LEQTKSDYLKRANELVQWINDKQASLESRDFGDSIESVQSFMANHKEYKTEKPPKGOEVSLEAIYNSLOTKLRLIKRE 343  
SpACTN THDMKIDYSRMKRLLGSIARMQEYWHYVQFENNYTQVQSHSNNAKFKATEKREWVKEKIDLESLLGTIQNLKTYQLR 331

.....330.....340.....350.....360.....370.....380.....390.....400

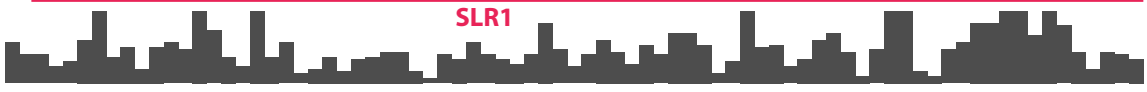

|         |                                                                                                                                                                                                                                                                                                                                                                                                                                                                                                                                                                                                                         |     |
|---------|-------------------------------------------------------------------------------------------------------------------------------------------------------------------------------------------------------------------------------------------------------------------------------------------------------------------------------------------------------------------------------------------------------------------------------------------------------------------------------------------------------------------------------------------------------------------------------------------------------------------------|-----|
|         | : . * : : * : * : .                                                                                                                                                                                                                                                                                                                                                                                                                                                                                                                                                                                                     |     |
| HsACTN1 | AFMPSEGRMVS <sup>D</sup> INNAWG <sup>C</sup> LE <sup>Q</sup> VEKGYE <sup>E</sup> WLLNE <sup>I</sup> RRLE <sup>R</sup> LDHLAEK <sup>F</sup> ROKAS <sup>I</sup> HEAW <sup>T</sup> DGKEAM <sup>L</sup> RQKDY <sup>E</sup> TATLSE <sup>I</sup> K                                                                                                                                                                                                                                                                                                                                                                            | 431 |
| HsACTN4 | AFMPSEGRMVS <sup>D</sup> INNGW <sup>H</sup> LE <sup>Q</sup> AEKGYE <sup>E</sup> WLLNE <sup>I</sup> RRLE <sup>R</sup> LDHLAEK <sup>F</sup> ROKAS <sup>I</sup> HEAW <sup>T</sup> DGKEAM <sup>L</sup> KHRDY <sup>E</sup> TATLSD <sup>I</sup> K                                                                                                                                                                                                                                                                                                                                                                             | 450 |
| HsACTN2 | AFMPSEGRMVS <sup>D</sup> IAGAW <sup>Q</sup> RLE <sup>Q</sup> AEKGYE <sup>E</sup> WLLNE <sup>I</sup> RRLE <sup>R</sup> LEHLAEK <sup>F</sup> ROKAS <sup>T</sup> HETWAY <sup>G</sup> KE <sup>Q</sup> ILLQKDY <sup>E</sup> SASL <sup>T</sup> EV <sup>R</sup>                                                                                                                                                                                                                                                                                                                                                                | 438 |
| HsACTN3 | AFMPSEGLVSDIANAW <sup>R</sup> GLE <sup>Q</sup> VEKGYE <sup>D</sup> WLLSE <sup>I</sup> RRLE <sup>R</sup> LQHLAEK <sup>F</sup> ROKAS <sup>L</sup> HEAW <sup>T</sup> RGKEEM <sup>L</sup> SQRDY <sup>S</sup> ALLQ <sup>E</sup> EV <sup>R</sup>                                                                                                                                                                                                                                                                                                                                                                              | 445 |
| DmACTN  | A <sup>Y</sup> L <sup>P</sup> T <sup>E</sup> G <sup>K</sup> T <sup>V</sup> S <sup>D</sup> I <sup>S</sup> N <sup>S</sup> W <sup>K</sup> G <sup>L</sup> E <sup>L</sup> A <sup>E</sup> K <sup>A</sup> F <sup>E</sup> E <sup>W</sup> L <sup>L</sup> A <sup>E</sup> T <sup>M</sup> R <sup>L</sup> E <sup>R</sup> L <sup>E</sup> H <sup>L</sup> A <sup>O</sup> K <sup>F</sup> K <sup>H</sup> K <sup>A</sup> D <sup>A</sup> H <sup>E</sup> D <sup>W</sup> T <sup>R</sup> G <sup>K</sup> E <sup>E</sup> M <sup>L</sup> S <sup>Q</sup> D <sup>F</sup> R <sup>Q</sup> C <sup>K</sup> L <sup>N</sup> E <sup>L</sup> K              | 434 |
| CeACTN  | A <sup>F</sup> L <sup>P</sup> R <sup>D</sup> G <sup>H</sup> L <sup>I</sup> K <sup>D</sup> I <sup>N</sup> A <sup>A</sup> W <sup>A</sup> G <sup>L</sup> E <sup>D</sup> S <sup>E</sup> K <sup>G</sup> F <sup>E</sup> E <sup>W</sup> L <sup>L</sup> S <sup>E</sup> I <sup>M</sup> R <sup>L</sup> E <sup>R</sup> L <sup>E</sup> H <sup>L</sup> A <sup>E</sup> K <sup>F</sup> R <sup>R</sup> K <sup>C</sup> A <sup>L</sup> H <sup>E</sup> E <sup>W</sup> A <sup>H</sup> G <sup>K</sup> E <sup>D</sup> A <sup>L</sup> R <sup>S</sup> N <sup>D</sup> W <sup>R</sup> S <sup>C</sup> G <sup>L</sup> Y <sup>K</sup> I <sup>K</sup> | 462 |
| DdACTN  | P <sup>F</sup> V <sup>A</sup> P <sup>A</sup> G <sup>L</sup> T <sup>P</sup> N <sup>E</sup> I <sup>D</sup> S <sup>T</sup> W <sup>S</sup> A <sup>L</sup> E <sup>K</sup> A <sup>E</sup> Q <sup>E</sup> H <sup>A</sup> E <sup>A</sup> L <sup>R</sup> I <sup>E</sup> L <sup>K</sup> R <sup>Q</sup> K <sup>I</sup> A <sup>V</sup> L <sup>L</sup> O <sup>K</sup> Y <sup>N</sup> R <sup>I</sup> L <sup>K</sup> K <sup>L</sup> E <sup>N</sup> W <sup>A</sup> T <sup>T</sup> K <sup>S</sup> V <sup>L</sup> G <sup>S</sup> N <sup>E</sup> T <sup>G</sup> D <sup>S</sup> -I <sup>T</sup> A <sup>V</sup> Q                            | 422 |
| SpACTN  | K <sup>Y</sup> E <sup>P</sup> P <sup>A</sup> G <sup>L</sup> K <sup>I</sup> V <sup>D</sup> L <sup>E</sup> R <sup>Q</sup> W <sup>K</sup> D <sup>F</sup> L <sup>S</sup> E <sup>E</sup> A <sup>N</sup> Q <sup>S</sup> K <sup>L</sup> I <sup>N</sup> T <sup>H</sup> M <sup>R</sup> -----                                                                                                                                                                                                                                                                                                                                     | 367 |

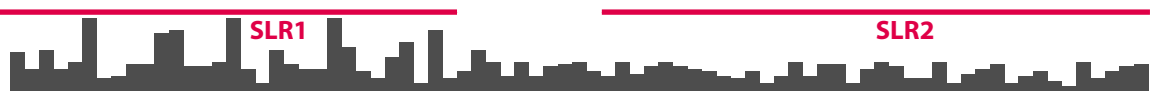

|         |                                                                                                                                                                                                                                                                                                                                                                                                                                                                                                                                          |     |
|---------|------------------------------------------------------------------------------------------------------------------------------------------------------------------------------------------------------------------------------------------------------------------------------------------------------------------------------------------------------------------------------------------------------------------------------------------------------------------------------------------------------------------------------------------|-----|
|         | ACTN2 T495M ↴                                                                                                                                                                                                                                                                                                                                                                                                                                                                                                                            |     |
| HsACTN1 | ALLKKHEAFES <sup>D</sup> LAAH <sup>Q</sup> DR-VE <sup>Q</sup> IAAIA <sup>Q</sup> ELN <sup>E</sup> LDY <sup>D</sup> YD <sup>S</sup> PSV <sup>N</sup> AR-C <sup>O</sup> KI <sup>C</sup> D <sup>O</sup> W <sup>D</sup> N <sup>L</sup> G <sup>A</sup> L <sup>T</sup> Q <sup>K</sup> R <sup>R</sup> E <sup>A</sup> L <sup>E</sup> R <sup>T</sup> E <sup>K</sup> L <sup>L</sup> E <sup>T</sup> I <sup>D</sup> Q                                                                                                                                | 509 |
| HsACTN4 | ALIRKHEAFES <sup>D</sup> LAAH <sup>Q</sup> DR-VE <sup>Q</sup> IAAIA <sup>Q</sup> ELN <sup>E</sup> LDY <sup>D</sup> YD <sup>S</sup> H <sup>N</sup> V <sup>N</sup> TR-C <sup>O</sup> KI <sup>C</sup> D <sup>O</sup> W <sup>D</sup> A <sup>L</sup> G <sup>S</sup> L <sup>T</sup> H <sup>S</sup> R <sup>R</sup> E <sup>A</sup> L <sup>E</sup> K <sup>T</sup> E <sup>K</sup> Q <sup>L</sup> E <sup>A</sup> I <sup>D</sup> Q                                                                                                                   | 528 |
| HsACTN2 | ALLRKHEAFES <sup>D</sup> LAAH <sup>Q</sup> DR-VE <sup>Q</sup> IAAIA <sup>Q</sup> ELN <sup>E</sup> LDY <sup>H</sup> D <sup>A</sup> V <sup>N</sup> V <sup>N</sup> DR-C <sup>O</sup> KI <sup>C</sup> D <sup>O</sup> W <sup>D</sup> R <sup>L</sup> G <sup>T</sup> L <sup>T</sup> Q <sup>K</sup> R <sup>R</sup> E <sup>A</sup> L <sup>E</sup> R <sup>M</sup> E <sup>K</sup> L <sup>L</sup> E <sup>T</sup> I <sup>D</sup> Q                                                                                                                    | 516 |
| HsACTN3 | ALLRRHEAFES <sup>D</sup> LAAH <sup>Q</sup> DR-VE <sup>H</sup> IAA <sup>L</sup> A <sup>Q</sup> ELN <sup>E</sup> LDY <sup>H</sup> E <sup>A</sup> S <sup>V</sup> NS <sup>R</sup> -C <sup>O</sup> A <sup>I</sup> C <sup>D</sup> O <sup>W</sup> D <sup>N</sup> L <sup>G</sup> T <sup>L</sup> T <sup>Q</sup> K <sup>R</sup> R <sup>D</sup> A <sup>L</sup> E <sup>R</sup> M <sup>E</sup> K <sup>L</sup> L <sup>E</sup> T <sup>I</sup> D <sup>Q</sup>                                                                                            | 523 |
| DmACTN  | ALKKKHEAFES <sup>D</sup> LAAH <sup>Q</sup> DR-VE <sup>Q</sup> IAAIA <sup>Q</sup> ELN <sup>T</sup> L <sup>E</sup> Y <sup>H</sup> D <sup>C</sup> V <sup>S</sup> V <sup>N</sup> AR-C <sup>O</sup> R <sup>I</sup> C <sup>D</sup> O <sup>W</sup> D <sup>R</sup> L <sup>G</sup> A <sup>L</sup> T <sup>Q</sup> R <sup>R</sup> R <sup>T</sup> A <sup>L</sup> D <sup>E</sup> A <sup>E</sup> R <sup>I</sup> L <sup>E</sup> K <sup>I</sup> D <sup>I</sup>                                                                                           | 512 |
| CeACTN  | ALRRKHEAFES <sup>D</sup> LG <sup>A</sup> H <sup>Q</sup> DR-VE <sup>Q</sup> IAA <sup>I</sup> A <sup>R</sup> E <sup>L</sup> N <sup>N</sup> L <sup>R</sup> Y <sup>P</sup> D <sup>I</sup> G <sup>P</sup> I <sup>N</sup> AR-C <sup>O</sup> A <sup>I</sup> C <sup>S</sup> O <sup>W</sup> D <sup>R</sup> L <sup>G</sup> O <sup>L</sup> S <sup>K</sup> R <sup>R</sup> E <sup>T</sup> L <sup>E</sup> D <sup>A</sup> E <sup>R</sup> I <sup>A</sup> E <sup>R</sup> L <sup>D</sup> S                                                                 | 540 |
| DdACTN  | AKLKNLEAFD <sup>G</sup> C <sup>O</sup> S <sup>L</sup> E <sup>G</sup> O <sup>S</sup> N <sup>S</sup> D <sup>L</sup> L <sup>S</sup> I <sup>L</sup> A <sup>Q</sup> L <sup>T</sup> E <sup>L</sup> N <sup>Y</sup> N <sup>G</sup> V <sup>P</sup> E <sup>L</sup> T <sup>E</sup> R <sup>K</sup> D <sup>T</sup> F <sup>A</sup> Q <sup>O</sup> W <sup>T</sup> G <sup>V</sup> K <sup>S</sup> S <sup>A</sup> E <sup>T</sup> Y <sup>K</sup> N <sup>T</sup> L <sup>L</sup> A <sup>E</sup> L <sup>E</sup> R <sup>L</sup> O <sup>K</sup> I <sup>E</sup> D | 502 |
| SpACTN  | -----E <sup>I</sup> K <sup>E</sup> S                                                                                                                                                                                                                                                                                                                                                                                                                                                                                                     | 372 |

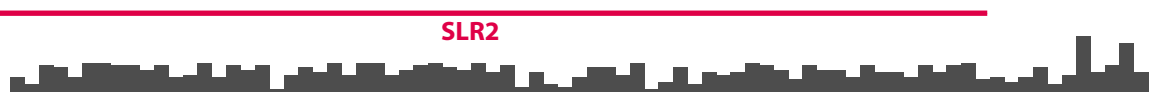

|         |                                                                                                                                                                                                                                                                                                                                                                                                                                                                                                                                                                                                                         |               |  |
|---------|-------------------------------------------------------------------------------------------------------------------------------------------------------------------------------------------------------------------------------------------------------------------------------------------------------------------------------------------------------------------------------------------------------------------------------------------------------------------------------------------------------------------------------------------------------------------------------------------------------------------------|---------------|--|
|         | ACTN3 R577X ↴                                                                                                                                                                                                                                                                                                                                                                                                                                                                                                                                                                                                           | ACTN2 E583A ↴ |  |
| HsACTN1 | L <sup>Y</sup> L <sup>E</sup> Y <sup>A</sup> K <sup>R</sup> A <sup>A</sup> P <sup>F</sup> N <sup>N</sup> W <sup>M</sup> E <sup>G</sup> A <sup>M</sup> E <sup>D</sup> L <sup>O</sup> D <sup>T</sup> F <sup>I</sup> V <sup>H</sup> T <sup>I</sup> E <sup>E</sup> I <sup>Q</sup> G <sup>L</sup> T <sup>T</sup> A <sup>H</sup> E <sup>O</sup> F <sup>K</sup> A <sup>T</sup> L <sup>P</sup> D <sup>A</sup> D <sup>K</sup> E <sup>R</sup> L <sup>A</sup> I <sup>L</sup> G <sup>I</sup> H <sup>N</sup> E <sup>V</sup> S <sup>K</sup> I <sup>V</sup> Q <sup>T</sup> Y <sup>H</sup> V <sup>N</sup> M <sup>A</sup> G <sup>T</sup> | 589           |  |
| HsACTN4 | L <sup>H</sup> L <sup>E</sup> Y <sup>A</sup> K <sup>R</sup> A <sup>A</sup> P <sup>F</sup> N <sup>N</sup> W <sup>M</sup> E <sup>S</sup> A <sup>M</sup> E <sup>D</sup> L <sup>O</sup> D <sup>M</sup> F <sup>I</sup> V <sup>H</sup> T <sup>I</sup> E <sup>E</sup> I <sup>E</sup> G <sup>L</sup> I <sup>S</sup> A <sup>H</sup> D <sup>O</sup> F <sup>K</sup> S <sup>T</sup> L <sup>P</sup> D <sup>A</sup> D <sup>R</sup> E <sup>R</sup> E <sup>A</sup> I <sup>L</sup> A <sup>I</sup> H <sup>K</sup> E <sup>A</sup> Q <sup>R</sup> I <sup>A</sup> E <sup>S</sup> N <sup>H</sup> I <sup>K</sup> L <sup>S</sup> G <sup>S</sup> | 608           |  |
| HsACTN2 | L <sup>H</sup> L <sup>E</sup> F <sup>A</sup> K <sup>R</sup> A <sup>A</sup> P <sup>F</sup> N <sup>N</sup> W <sup>M</sup> E <sup>G</sup> A <sup>M</sup> E <sup>D</sup> L <sup>O</sup> D <sup>M</sup> F <sup>I</sup> V <sup>H</sup> S <sup>I</sup> E <sup>E</sup> I <sup>Q</sup> S <sup>L</sup> I <sup>T</sup> A <sup>H</sup> E <sup>O</sup> F <sup>K</sup> A <sup>T</sup> L <sup>P</sup> E <sup>A</sup> D <sup>R</sup> E <sup>R</sup> G <sup>A</sup> I <sup>M</sup> G <sup>I</sup> O <sup>G</sup> E <sup>I</sup> O <sup>K</sup> I <sup>C</sup> O <sup>T</sup> Y <sup>G</sup> L <sup>R</sup> P <sup>C</sup> S <sup>T</sup> | 596           |  |
| HsACTN3 | L <sup>Q</sup> L <sup>E</sup> F <sup>A</sup> R <sup>R</sup> A <sup>A</sup> P <sup>F</sup> N <sup>N</sup> W <sup>L</sup> D <sup>G</sup> A <sup>V</sup> E <sup>D</sup> L <sup>O</sup> D <sup>V</sup> L <sup>V</sup> H <sup>S</sup> V <sup>E</sup> E <sup>T</sup> O <sup>S</sup> L <sup>L</sup> T <sup>A</sup> H <sup>D</sup> O <sup>F</sup> K <sup>A</sup> T <sup>L</sup> P <sup>E</sup> A <sup>D</sup> R <sup>R</sup> E <sup>G</sup> A <sup>I</sup> M <sup>G</sup> I <sup>O</sup> G <sup>E</sup> I <sup>O</sup> K <sup>I</sup> C <sup>O</sup> T <sup>Y</sup> G <sup>L</sup> R <sup>P</sup> C <sup>S</sup> T              | 603           |  |
| DmACTN  | L <sup>H</sup> L <sup>E</sup> F <sup>A</sup> K <sup>R</sup> A <sup>A</sup> P <sup>F</sup> N <sup>N</sup> W <sup>L</sup> D <sup>G</sup> T <sup>R</sup> E <sup>D</sup> L <sup>V</sup> D <sup>M</sup> F <sup>I</sup> V <sup>H</sup> T <sup>M</sup> E <sup>E</sup> I <sup>Q</sup> G <sup>L</sup> I <sup>Q</sup> A <sup>H</sup> D <sup>O</sup> F <sup>K</sup> A <sup>T</sup> L <sup>G</sup> E <sup>A</sup> D <sup>K</sup> E <sup>F</sup> N <sup>L</sup> I <sup>V</sup> N <sup>L</sup> V <sup>R</sup> E <sup>V</sup> E <sup>S</sup> I <sup>V</sup> K <sup>O</sup> H <sup>I</sup> P <sup>G</sup> G <sup>L</sup> E              | 592           |  |
| CeACTN  | L <sup>Y</sup> L <sup>D</sup> F <sup>A</sup> K <sup>R</sup> A <sup>A</sup> P <sup>F</sup> N <sup>N</sup> W <sup>L</sup> D <sup>G</sup> A <sup>R</sup> E <sup>D</sup> L <sup>A</sup> D <sup>L</sup> V <sup>I</sup> V <sup>H</sup> E <sup>M</sup> R <sup>E</sup> I <sup>E</sup> E <sup>L</sup> V <sup>N</sup> A <sup>H</sup> D <sup>O</sup> F <sup>K</sup> S <sup>T</sup> L <sup>G</sup> D <sup>A</sup> D <sup>R</sup> E <sup>F</sup> S <sup>S</sup> I <sup>N</sup> Q <sup>I</sup> E <sup>H</sup> E <sup>V</sup> E <sup>H</sup> L <sup>V</sup> T <sup>S</sup> H <sup>G</sup> L <sup>D</sup> R <sup>E</sup> L <sup>L</sup> | 620           |  |
| DdACTN  | S <sup>L</sup> V <sup>E</sup> F <sup>A</sup> K <sup>R</sup> A <sup>A</sup> Q <sup>L</sup> N <sup>V</sup> W <sup>I</sup> E <sup>A</sup> A <sup>D</sup> D <sup>H</sup> V <sup>F</sup> D <sup>P</sup> I <sup>N</sup> V <sup>D</sup> S <sup>V</sup> O <sup>G</sup> V <sup>O</sup> E <sup>I</sup> O <sup>E</sup> K <sup>F</sup> D <sup>A</sup> F <sup>L</sup> H <sup>D</sup> O <sup>S</sup> Q <sup>O</sup> F <sup>A</sup> E <sup>L</sup> E <sup>A</sup> L <sup>A</sup> A <sup>L</sup> T <sup>Q</sup> L <sup>R</sup> E <sup>L</sup> G <sup>R</sup> S <sup>E</sup> -----                                                       | 575           |  |
| SpACTN  | M <sup>R</sup> I <sup>A</sup> F <sup>A</sup> D <sup>R</sup> A <sup>N</sup> S <sup>F</sup> S <sup>K</sup> M <sup>L</sup> S <sup>T</sup> I <sup>S</sup> N <sup>E</sup> I <sup>T</sup> N-----                                                                                                                                                                                                                                                                                                                                                                                                                              | 397           |  |

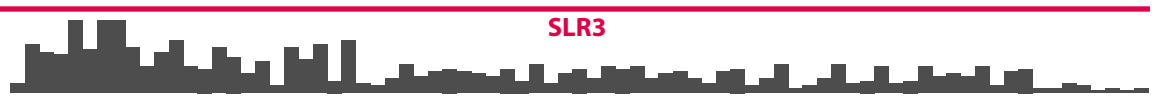

|         |                                                                                                                                                                                                                                                                                                                                                                                                                                                                                                                                                                                                             |     |
|---------|-------------------------------------------------------------------------------------------------------------------------------------------------------------------------------------------------------------------------------------------------------------------------------------------------------------------------------------------------------------------------------------------------------------------------------------------------------------------------------------------------------------------------------------------------------------------------------------------------------------|-----|
|         | ACTN2 E628G ↴                                                                                                                                                                                                                                                                                                                                                                                                                                                                                                                                                                                               |     |
| HsACTN1 | -N <sup>P</sup> Y <sup>T</sup> T <sup>I</sup> T <sup>P</sup> Q <sup>E</sup> I <sup>N</sup> G <sup>K</sup> W <sup>D</sup> H <sup>V</sup> R <sup>O</sup> L <sup>V</sup> P <sup>R</sup> R <sup>D</sup> Q <sup>A</sup> L <sup>T</sup> E <sup>H</sup> A <sup>R</sup> O <sup>O</sup> H <sup>N</sup> E <sup>R</sup> L <sup>R</sup> K <sup>O</sup> F <sup>G</sup> A <sup>Q</sup> A <sup>N</sup> V <sup>I</sup> G <sup>P</sup> W <sup>I</sup> O <sup>T</sup> K <sup>M</sup> E <sup>E</sup> I <sup>G</sup> R <sup>I</sup> S <sup>I</sup> E <sup>M</sup> H <sup>G</sup> T <sup>L</sup> E <sup>D</sup> O <sup>L</sup>   | 668 |
| HsACTN4 | -N <sup>P</sup> Y <sup>T</sup> T <sup>V</sup> T <sup>P</sup> Q <sup>I</sup> I <sup>N</sup> S <sup>K</sup> W <sup>E</sup> K <sup>V</sup> Q <sup>O</sup> L <sup>V</sup> P <sup>K</sup> R <sup>D</sup> H <sup>A</sup> L <sup>L</sup> E <sup>E</sup> O <sup>S</sup> K <sup>O</sup> O <sup>S</sup> N <sup>E</sup> H <sup>L</sup> R <sup>R</sup> O <sup>F</sup> A <sup>S</sup> Q <sup>A</sup> N <sup>V</sup> V <sup>G</sup> P <sup>W</sup> I <sup>O</sup> T <sup>K</sup> M <sup>E</sup> E <sup>I</sup> G <sup>R</sup> I <sup>S</sup> I <sup>E</sup> M <sup>N</sup> G <sup>T</sup> L <sup>E</sup> D <sup>O</sup> L | 687 |
| HsACTN2 | -N <sup>P</sup> Y <sup>S</sup> T <sup>V</sup> T <sup>M</sup> D <sup>E</sup> L <sup>R</sup> T <sup>K</sup> W <sup>D</sup> K <sup>V</sup> Q <sup>L</sup> V <sup>P</sup> I <sup>R</sup> D <sup>Q</sup> S <sup>L</sup> Q <sup>E</sup> E <sup>L</sup> A <sup>R</sup> O <sup>H</sup> A <sup>N</sup> E <sup>R</sup> L <sup>R</sup> R <sup>O</sup> F <sup>A</sup> A <sup>Q</sup> A <sup>N</sup> A <sup>I</sup> G <sup>P</sup> W <sup>I</sup> O <sup>N</sup> K <sup>M</sup> E <sup>E</sup> I <sup>A</sup> R <sup>S</sup> S <sup>I</sup> O <sup>I</sup> T <sup>G</sup> A <sup>L</sup> E <sup>D</sup> O <sup>M</sup>   | 675 |
| HsACTN3 | -N <sup>P</sup> Y <sup>I</sup> T <sup>L</sup> S <sup>P</sup> O <sup>D</sup> I <sup>N</sup> T <sup>K</sup> W <sup>D</sup> M <sup>V</sup> R <sup>K</sup> L <sup>V</sup> P <sup>S</sup> R <sup>D</sup> Q <sup>T</sup> L <sup>Q</sup> E <sup>E</sup> L <sup>A</sup> R <sup>O</sup> V <sup>N</sup> E <sup>R</sup> L <sup>R</sup> R <sup>O</sup> F <sup>A</sup> A <sup>Q</sup> A <sup>N</sup> A <sup>I</sup> G <sup>P</sup> W <sup>I</sup> O <sup>A</sup> K <sup>V</sup> E <sup>E</sup> V <sup>G</sup> R <sup>L</sup> A <sup>G</sup> L <sup>A</sup> G <sup>S</sup> L <sup>E</sup> E <sup>O</sup> M                | 682 |
| DmACTN  | -N <sup>P</sup> Y <sup>T</sup> T <sup>L</sup> T <sup>A</sup> N <sup>D</sup> M <sup>T</sup> R <sup>K</sup> W <sup>S</sup> D <sup>V</sup> R <sup>O</sup> L <sup>V</sup> P <sup>O</sup> R <sup>D</sup> Q <sup>T</sup> L <sup>A</sup> N <sup>E</sup> L <sup>R</sup> K <sup>O</sup> O <sup>N</sup> N <sup>E</sup> M <sup>L</sup> R <sup>R</sup> O <sup>F</sup> A <sup>E</sup> K <sup>A</sup> N <sup>I</sup> V <sup>G</sup> P <sup>W</sup> I <sup>E</sup> R <sup>O</sup> M <sup>D</sup> A <sup>V</sup> T <sup>A</sup> I <sup>G</sup> M <sup>G</sup> L <sup>O</sup> S <sup>L</sup> E <sup>D</sup> O <sup>L</sup>   | 671 |
| CeACTN  | R <sup>N</sup> P <sup>Y</sup> T <sup>D</sup> L <sup>S</sup> A <sup>S</sup> D <sup>I</sup> R <sup>R</sup> K <sup>W</sup> G <sup>E</sup> V <sup>O</sup> N <sup>S</sup> V <sup>P</sup> R <sup>R</sup> D <sup>S</sup> O <sup>L</sup> Q <sup>A</sup> E <sup>L</sup> K <sup>R</sup> O <sup>O</sup> N <sup>N</sup> E <sup>R</sup> L <sup>R</sup> T <sup>I</sup> F <sup>A</sup> E <sup>K</sup> A <sup>N</sup> O <sup>V</sup> G <sup>P</sup> W <sup>L</sup> E <sup>R</sup> E <sup>L</sup> E <sup>Q</sup> V <sup>L</sup> A <sup>I</sup> G <sup>L</sup> G <sup>R</sup> R <sup>L</sup> E <sup>D</sup> A <sup>I</sup>    | 700 |
| DdACTN  | -N <sup>D</sup> Y <sup>S</sup> V <sup>I</sup> S <sup>Y</sup> D <sup>E</sup> L <sup>S</sup> A <sup>K</sup> W <sup>N</sup> N <sup>L</sup> L <sup>A</sup> G <sup>I</sup> E <sup>E</sup> R <sup>K</sup> V <sup>O</sup> L <sup>A</sup> N <sup>E</sup> L <sup>T</sup> T <sup>O</sup> T <sup>N</sup> D <sup>V</sup> L <sup>C</sup> O <sup>S</sup> F <sup>S</sup> V <sup>K</sup> A <sup>N</sup> E <sup>I</sup> S <sup>D</sup> Y <sup>V</sup> R <sup>V</sup> T <sup>L</sup> D <sup>A</sup> I <sup>S</sup> O <sup>N</sup> ---T <sup>S</sup> S <sup>D</sup> P <sup>O</sup> E <sup>O</sup> L                            | 651 |
| SpACTN  | -----L <sup>O</sup> G <sup>D</sup> W <sup>R</sup> D <sup>O</sup> L                                                                                                                                                                                                                                                                                                                                                                                                                                                                                                                                          | 406 |

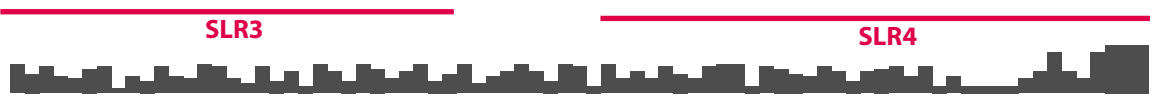

|         |                                                                                                                                                                                                                                                                                                                                                                                                                                                                                                                                                                                                            |               |  |
|---------|------------------------------------------------------------------------------------------------------------------------------------------------------------------------------------------------------------------------------------------------------------------------------------------------------------------------------------------------------------------------------------------------------------------------------------------------------------------------------------------------------------------------------------------------------------------------------------------------------------|---------------|--|
|         | ACTN1 T737N ↴                                                                                                                                                                                                                                                                                                                                                                                                                                                                                                                                                                                              | ACTN1 R738W ↴ |  |
| HsACTN1 | S <sup>H</sup> L <sup>R</sup> Q <sup>Y</sup> E <sup>K</sup> S <sup>I</sup> V <sup>N</sup> Y <sup>K</sup> P <sup>K</sup> I <sup>D</sup> Q <sup>L</sup> E <sup>G</sup> D <sup>H</sup> O <sup>L</sup> I <sup>Q</sup> E <sup>A</sup> L <sup>I</sup> F <sup>D</sup> N <sup>K</sup> H <sup>T</sup> N <sup>Y</sup> T <sup>M</sup> E <sup>H</sup> I <sup>R</sup> V <sup>G</sup> W <sup>E</sup> Q <sup>L</sup> L <sup>T</sup> I <sup>A</sup> R <sup>T</sup> I <sup>N</sup> E <sup>V</sup> E <sup>N</sup> O <sup>I</sup> L <sup>T</sup> R <sup>D</sup> A <sup>K</sup> G <sup>I</sup> S <sup>O</sup> E <sup>O</sup> M | 748           |  |
| HsACTN4 | S <sup>H</sup> L <sup>K</sup> Q <sup>Y</sup> E <sup>R</sup> S <sup>I</sup> V <sup>D</sup> Y <sup>K</sup> P <sup>N</sup> L <sup>D</sup> L <sup>L</sup> E <sup>Q</sup> O <sup>H</sup> Q <sup>L</sup> I <sup>Q</sup> E <sup>A</sup> L <sup>I</sup> F <sup>D</sup> N <sup>K</sup> H <sup>T</sup> N <sup>Y</sup> T <sup>M</sup> E <sup>H</sup> I <sup>R</sup> V <sup>G</sup> W <sup>E</sup> Q <sup>L</sup> L <sup>T</sup> I <sup>A</sup> R <sup>T</sup> I <sup>N</sup> E <sup>V</sup> E <sup>N</sup> O <sup>I</sup> L <sup>T</sup> R <sup>D</sup> A <sup>K</sup> G <sup>I</sup> S <sup>O</sup> E <sup>O</sup> M | 767           |  |
| HsACTN2 | N <sup>O</sup> L <sup>K</sup> Q <sup>Y</sup> E <sup>H</sup> N <sup>I</sup> N <sup>Y</sup> K <sup>N</sup> N <sup>I</sup> D <sup>K</sup> L <sup>E</sup> G <sup>D</sup> H <sup>O</sup> L <sup>I</sup> Q <sup>E</sup> A <sup>L</sup> V <sup>F</sup> D <sup>N</sup> K <sup>H</sup> T <sup>N</sup> Y <sup>T</sup> M <sup>E</sup> H <sup>I</sup> R <sup>V</sup> G <sup>W</sup> E <sup>L</sup> L <sup>L</sup> T <sup>T</sup> I <sup>A</sup> R <sup>T</sup> I <sup>N</sup> E <sup>V</sup> E <sup>T</sup> O <sup>I</sup> L <sup>T</sup> R <sup>D</sup> A <sup>K</sup> G <sup>I</sup> T <sup>O</sup> E <sup>O</sup> M | 755           |  |
| HsACTN3 | A <sup>G</sup> L <sup>R</sup> Q <sup>O</sup> E <sup>Q</sup> N <sup>I</sup> N <sup>Y</sup> K <sup>T</sup> N <sup>I</sup> D <sup>R</sup> L <sup>E</sup> G <sup>D</sup> H <sup>O</sup> L <sup>L</sup> Q <sup>E</sup> S <sup>L</sup> V <sup>F</sup> D <sup>N</sup> K <sup>H</sup> T <sup>V</sup> Y <sup>S</sup> M <sup>E</sup> H <sup>I</sup> R <sup>V</sup> G <sup>W</sup> E <sup>Q</sup> L <sup>L</sup> T <sup>S</sup> I <sup>A</sup> R <sup>T</sup> I <sup>N</sup> E <sup>V</sup> E <sup>N</sup> O <sup>V</sup> L <sup>T</sup> R <sup>D</sup> A <sup>K</sup> G <sup>L</sup> S <sup>O</sup> E <sup>Q</sup> L | 762           |  |
| DmACTN  | H <sup>R</sup> L <sup>K</sup> E <sup>Y</sup> Q <sup>A</sup> V <sup>Y</sup> A <sup>Y</sup> K <sup>P</sup> N <sup>I</sup> E <sup>E</sup> L <sup>K</sup> I <sup>H</sup> O <sup>A</sup> V <sup>O</sup> E <sup>S</sup> M <sup>I</sup> F <sup>E</sup> N <sup>R</sup> Y <sup>T</sup> N <sup>Y</sup> T <sup>M</sup> E <sup>T</sup> L <sup>R</sup> V <sup>G</sup> W <sup>E</sup> Q <sup>L</sup> L <sup>T</sup> S <sup>I</sup> N <sup>R</sup> N <sup>I</sup> N <sup>E</sup> V <sup>E</sup> N <sup>O</sup> I <sup>L</sup> T <sup>R</sup> D <sup>S</sup> K <sup>G</sup> I <sup>S</sup> O <sup>E</sup> Q <sup>L</sup>   | 751           |  |
| CeACTN  | Q <sup>O</sup> L <sup>R</sup> S <sup>I</sup> Q <sup>R</sup> N <sup>V</sup> L <sup>G</sup> Y <sup>K</sup> P <sup>N</sup> L <sup>D</sup> E <sup>L</sup> E <sup>R</sup> V <sup>H</sup> O <sup>E</sup> M <sup>E</sup> N <sup>F</sup> V <sup>F</sup> E <sup>N</sup> R <sup>K</sup> S <sup>R</sup> Y <sup>S</sup> M <sup>S</sup> E <sup>L</sup> R <sup>V</sup> G <sup>W</sup> E <sup>T</sup> L <sup>L</sup> T <sup>S</sup> I <sup>N</sup> K <sup>T</sup> I <sup>N</sup> E <sup>F</sup> E <sup>N</sup> O <sup>V</sup> L <sup>L</sup> R <sup>D</sup> S <sup>K</sup> G <sup>I</sup> S <sup>E</sup> E <sup>Q</sup> I | 780           |  |
| DdACTN  | N <sup>N</sup> I <sup>R</sup> A <sup>I</sup> I <sup>T</sup> A <sup>H</sup> A <sup>E</sup> K <sup>K</sup> P <sup>E</sup> L <sup>D</sup> E <sup>L</sup> Y <sup>T</sup> I <sup>A</sup> S <sup>O</sup> L <sup>E</sup> A <sup>Q</sup> V <sup>D</sup> N <sup>K</sup> H <sup>T</sup> O <sup>H</sup> S <sup>L</sup> E <sup>S</sup> I <sup>K</sup> L <sup>K</sup> W <sup>D</sup> K <sup>L</sup> N <sup>T</sup> L <sup>A</sup> K <sup>K</sup> N <sup>E</sup> O <sup>V</sup> V <sup>E</sup> G <sup>E</sup> I <sup>L</sup> A <sup>K</sup> O <sup>L</sup> T <sup>G</sup> V <sup>T</sup> A <sup>E</sup> E <sup>L</sup>   | 731           |  |
| SpACTN  | D <sup>H</sup> V <sup>E</sup> F <sup>L</sup> Q <sup>E</sup> H <sup>L</sup> G <sup>P</sup> L <sup>E</sup> V <sup>E</sup> L <sup>A</sup> S <sup>V</sup> K <sup>V</sup> L <sup>Y</sup> D <sup>N</sup> C <sup>F</sup> Q <sup>A</sup> G <sup>I</sup> E <sup>E</sup> N <sup>D</sup> Y <sup>T</sup> M <sup>F</sup> S <sup>Y</sup> E <sup>D</sup> L <sup>E</sup> H <sup>E</sup> F <sup>G</sup> I <sup>T</sup> A <sup>N</sup> I <sup>A</sup> N <sup>K</sup> I <sup>K</sup> Y <sup>L</sup> E <sup>N</sup> E <sup>L</sup> L <sup>E</sup> R <sup>E</sup> K <sup>R</sup> T <sup>L</sup> S <sup>K</sup> O <sup>E</sup> L | 486           |  |

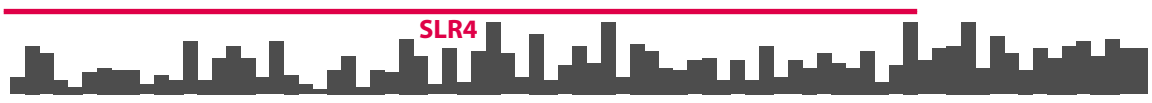

ACTN2 R759T ↴

ACTN1 R752Q ↴

ACTN1 G764S ↴

ACTN1 E769K ↴

|         |                                                                                    |     |                       |
|---------|------------------------------------------------------------------------------------|-----|-----------------------|
|         | : * ** : . . : : : * * * *                                                         |     | : : : * : : . * : . . |
| HsACTN1 | NEFRASFNHFDRDHSGLGPEEFKACLISLGYDIGNDPQGEAEFARIMSIVDPNRLGVVTFQAFIDFMSRETTADTDTADQ   | 828 |                       |
| HsACTN4 | QEFRASFNHFDKDHGGALGPEEFKACLISLGYDVENDROGEAEFNRMISLVDPNHSGLVTFQAFIDFMSRETTDITDADQ   | 847 |                       |
| HsACTN2 | NEFRASFNHFDRRKNGLMDHEDFRACLISMGYDLG-----EAEFARIMTLVDPNGQGTVTFQSFIDFMTRETTADTDTAEQ  | 830 |                       |
| HsACTN3 | NEFRASFNHFDRKRNGMMEPDDFRACLISMGYDLG-----EVEFARIMTMVDPNAAGVVTFQAFIDFMTRETTAETDTTEQ  | 837 |                       |
| DmACTN  | NEFRSFFNFHFDKNRTGRLSPEEFKSCVLSLGYSIGKDROGDLDFQRILAVVDPNNTGYVHFDAFLDFMTRESTDITDTAEQ | 831 |                       |
| CeACTN  | AEFRASFSHFDKERAG-LDPEQLRSCLISVGYTIRPGREGDAELHRVLAHVDPNRMGRVVFQAFIDFMTKENSQDTVEQ    | 859 |                       |
| DdACTN  | SEFKACFSHFDKDNDNKLNRLEFSSCLKSIGDELT-----EEQLNOVISKIDTDGNGTISFEFEIDYMVSSRKGTDVSVES  | 806 |                       |
| SpACTN  | DGITKVFRRHFEEKKSNMLNEVEFYAALASLGLVYD-----TEEGTALFHRAANSEEGVTYERFTEIVMEELEDSDSARQ   | 560 |                       |

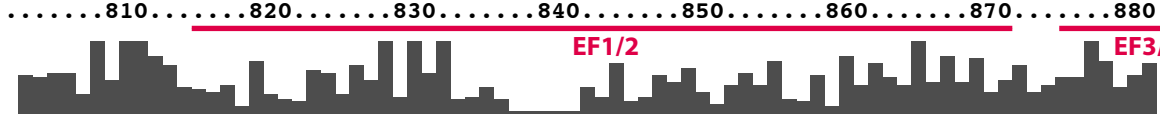

|         |                                                                     |     |               |
|---------|---------------------------------------------------------------------|-----|---------------|
|         | : * : * . * : : : : : * : : * : *                                   |     | . : * * : : * |
| HsACTN1 | VMASFKILAGDKNYITMDELRRRLP-PDQAEYCIARMAPYTGPDSPGALDYMSFSTALYGESDL--  | 892 |               |
| HsACTN4 | VIAAFKVLADGKNFITAEELRRRLP-PDQAEYCIARMAPYQGPDAVPGALDYKSFSTALYGESDL-- | 911 |               |
| HsACTN2 | VIAAFRILASDKPYILAEELRRRLP-PDQAEYCIKRMPSYSGPGSPGALDYAAFSSALYGESDL--  | 894 |               |
| HsACTN3 | VVASFKILAGDKNYITPEELRRRLP-AKQAEYCIKRMVYKGGSGAPAGALDYVAFSSALYGESDL-- | 901 |               |
| DmACTN  | VIDSFRILAADKPYILPDELRRRLP-PDQAEYCIQRMPPYKGPNGVPGALDYMSFSTALYGETDL-- | 895 |               |
| CeACTN  | MIDSFRILASGKTFITADELERRLP-RDQAAVCMARMAPSREPGAPPRSFYVTFSSRSLYSQ----- | 920 |               |
| DdACTN  | TKAAFVMAEDKDFITEAQIRAAISDSKQIDYLLASMP-----AVEGGFDYNSFAEKLYQ-----    | 861 |               |
| SpACTN  | VLYAFCDVADGKSYVSDDLLRSQVRNIVKFLCENMN-----KHSEGLDYLTIKQLLAEDKEIV     | 621 |               |

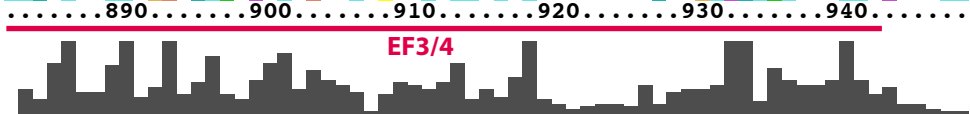

Supplement: 13578_2015_29_MOESM1_ESM.pdf [file 13578_2015_29_MOESM1_ESM.pdf]
